# Supplementary material for: Stereoselective Analysis of the Antiseizure Activity of Fenfluramine and Norfenfluramine in Mice: Is l-Norfenfluramine a Better Follow-Up Compound to Racemic-Fenfluramine?
Source: Preprints.org preprint supplement (doi:10.20944/preprints202312.1688.v1), 2023-12-22

**Figure 1.** s. Chemical structures of the two individual enantiomers of fenfluramine and its primary active primary metabolite norfenfluramine.


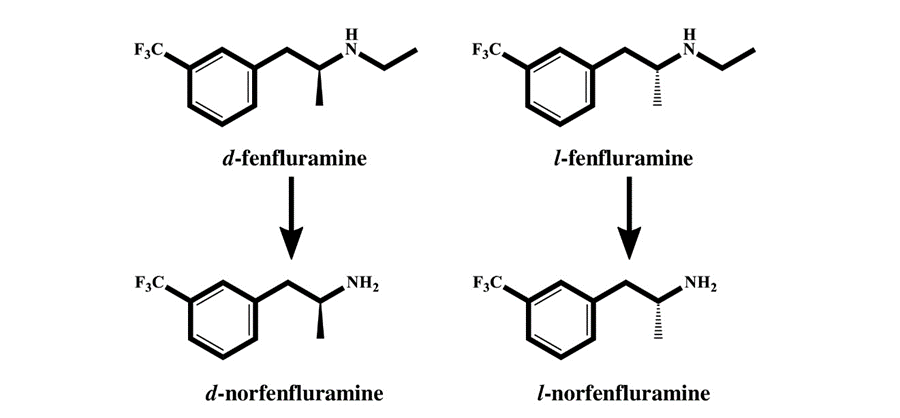

Supplement: Supplementary file 3 [file supplementary]
